# Supplementary material for: Stable Gender Gap and Similar Gender Trend in Chronic Morbidities between 1997–2015 in Adult Canary Population
Source: MDPI journal article supplement (doi:10.3390/ijerph19159404), 2022-07-31
Supplement: s1 [file s1]

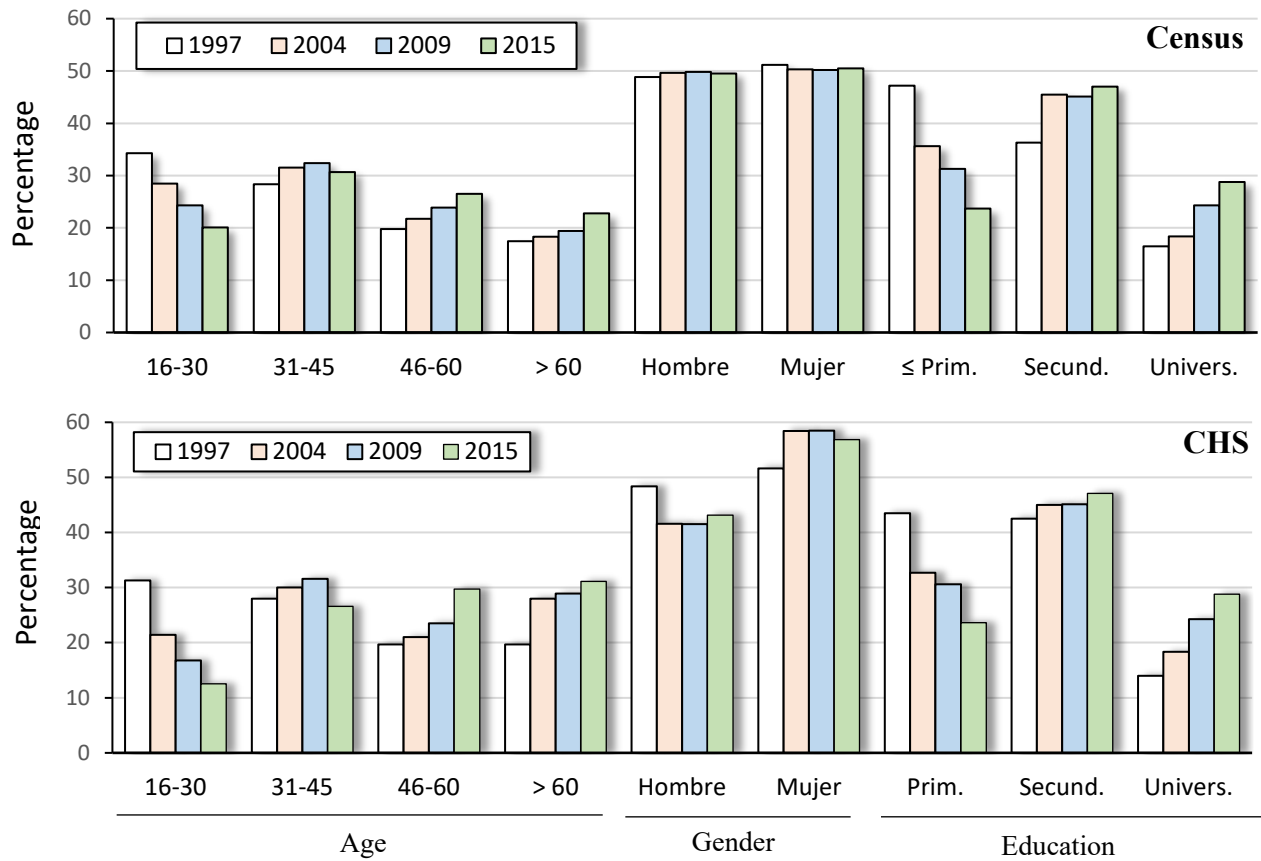

**Figure S1.** Evolution of the population structure of age, gender and education in Canary between 1997 a 2015. Above, census data, below, data from the Canary Islands Health Survey

—

-

—  
and
